CORRECTION

# Correction: Protective Effects of Myricetin on Acute Hypoxia-Induced Exercise Intolerance and Mitochondrial Impairments in Rats

Dan Zou, Peng Liu, Ka Chen, Qi Xie, Xinyu Liang, Qian Bai, Qicheng Zhou, Kai Liu, Ting Zhang, Jundong Zhu, Mantian Mi

There are multiple errors in the fifth sentence of the “Cell culture and treatments” subsection of the Materials and Methods. The correct sentence is: Differentiated L6 cells, given fresh media and reagents for 24 hours, were divided into five groups: a normoxia group (NORc) with vehicle, a control group (CONc) with vehicle, a myricetin group (10  $\mu\text{mol/L}$ , this concentration was used based on previous results by Huang et al.[23]; MC), a SIRT1-inhibited myricetin group (SI-MC) with both myricetin (10  $\mu\text{mol/L}$ ) and the SIRT1 inhibitor nicotinamide (5 mmol/L; Abcam, USA), an AMPK-inhibited myricetin group (AI-MC) with both myricetin (10  $\mu\text{mol/L}$ ) and the AMPK inhibitor dorsomorphin dihydrochloride (20  $\mu\text{mol/L}$ ; Santa Cruz, USA).

## Reference

1. Zou D, Liu P, Chen K, Xie Q, Liang X, Bai Q, et al. (2015) Protective Effects of Myricetin on Acute Hypoxia-Induced Exercise Intolerance and Mitochondrial Impairments in Rats. PLoS ONE 10(4): e0124727. doi:[10.1371/journal.pone.0124727](https://doi.org/10.1371/journal.pone.0124727) PMID: [25919288](https://pubmed.ncbi.nlm.nih.gov/25919288/)

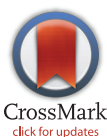

## OPEN ACCESS

**Citation:** Zou D, Liu P, Chen K, Xie Q, Liang X, Bai Q, et al. (2015) Correction: Protective Effects of Myricetin on Acute Hypoxia-Induced Exercise Intolerance and Mitochondrial Impairments in Rats. PLoS ONE 10(7): e0133336. doi:[10.1371/journal.pone.0133336](https://doi.org/10.1371/journal.pone.0133336)

**Published:** July 15, 2015

**Copyright:** © 2015 Zou et al. This is an open access article distributed under the terms of the [Creative Commons Attribution License](https://creativecommons.org/licenses/by/4.0/), which permits unrestricted use, distribution, and reproduction in any medium, provided the original author and source are credited.
